# Supplementary material for: Response of Intestinal Microbiota to the Variation in Diets in Grass Carp (Ctenopharyngodon idella)
Source: MDPI journal article supplement (doi:10.3390/metabo12111115), 2022-11-15
Supplement: s1 [file s1]

## Supplemental data

Table S1 Relative abundance of different bacterial phyla in grass carp.

| Percentage (%) | GF    | CF    |
|----------------|-------|-------|
| Firmicutes     | 20.49 | 61.59 |
| Proteobacteria | 56.59 | 25.42 |
| Actinobacteria | 10.77 | 2.97  |
| Fusobacteria   | 0.24  | 5.62  |
| Chloroflexi    | 3.93  | 1.02  |
| Acidobacteria  | 2.19  | 0.14  |
| Thaumarchaeota | 1.19  | 0.04  |
| Other          | 4.61  | 3.22  |

Table S2 Relative abundance of different bacterial classes in grass carp.

| Percentage (%)      | GF    | CF    |
|---------------------|-------|-------|
| Bacilli             | 16.11 | 55.58 |
| Alphaproteobacteria | 43.84 | 16.63 |
| Gammaproteobacteria | 9.51  | 7.51  |
| Actinobacteria      | 10.77 | 2.97  |
| Clostridia          | 3.70  | 5.24  |
| Fusobacteriia       | 0.24  | 5.62  |
| Betaproteobacteria  | 1.58  | 0.65  |
| Deltaproteobacteria | 1.40  | 0.36  |
| Caldilineae         | 1.02  | 0.25  |
| Other               | 11.84 | 5.19  |
